# Supplementary material for: Novel anti-inflammatory effects of the IL-1 receptor in kidney myeloid cells following ischemic AKI
Source: PubMed Central journal article supplement (PMC11061482; doi:10.3389/fmolb.2024.1366259), 2024-04-17
Supplement: DataSheet1.pdf [file DataSheet1.pdf]

*Supplementary Material*

**Novel anti-inflammatory effects of the IL-1 receptor in kidney myeloid cells following AKI**

**Yanting Chen, Xiaohan Lu, Raeann L. Whitney, Yu Li, Matthew J. Robson, Randy D. Blakely, Jen-Tsan Ashley Chi, Steven D. Crowley, Jamie R. Privratsky\***

\* **Correspondence:** Jamie R. Privratsky: [jamie.privratsky@duke.edu](mailto:jamie.privratsky@duke.edu)

## Supplementary Tables

| <b>Supplementary Table 1: Primers used for RT-PCR analysis</b> |                                        |
|----------------------------------------------------------------|----------------------------------------|
| <b>Gene</b>                                                    | <b>Accession number/catalog number</b> |
| <i>Gapdh</i>                                                   | Mm99999915 g1                          |
| <i>Il1r1</i>                                                   | Mm00434235 m1                          |
| <i>Il1rn</i>                                                   | Mm00446186 m1                          |
| <i>Il1b</i>                                                    | Mm00434228 m1                          |
| <i>Tnf</i>                                                     | Mm00443258 m1                          |
| <i>Il6</i>                                                     | Mm00446190 m1                          |
| <i>GAPDH</i>                                                   | Hs02786624 g1                          |
| LCN2                                                           | Hs00194353 m1                          |

**Supplementary Table 2: Fluorescent cell sorting antibodies**

| <b>Antibody</b>       | <b>Company</b> | <b>Catalog number, RRID</b> | <b>µl/test</b> |
|-----------------------|----------------|-----------------------------|----------------|
| Anti-CD16/CD32        | BioLegend      | 101320, RRID:AB 1574973     | 1.5            |
| FITC anti-CD11b       | BioLegend      | 101206, RRID:AB 312789      | 0.25           |
| PerCP/Cy5.5 anti-Ly6G | BioLegend      | 127616, RRID:AB 1877272     | 0.25           |
| PE anti-CD11c         | BioLegend      | 117308, RRID:AB 313777      | 0.25           |
| PE-Cy7 anti-F480      | BioLegend      | 123114, RRID:AB 893490      | 1              |
| APC anti-CD64         | BioLegend      | 139306, RRID:AB 11219391    | 1              |
| BV421 anti-CD103      | BioLegend      | 121422, RRID:AB 2562901     | 1              |
| BV510 anti-Ly6C       | BioLegend      | 128033, RRID:AB 2562351     | 0.5            |
| BV785 anti-CD45       | BioLegend      | 103149, RRID:AB 2564590     | 0.1            |

Supplementary Figures

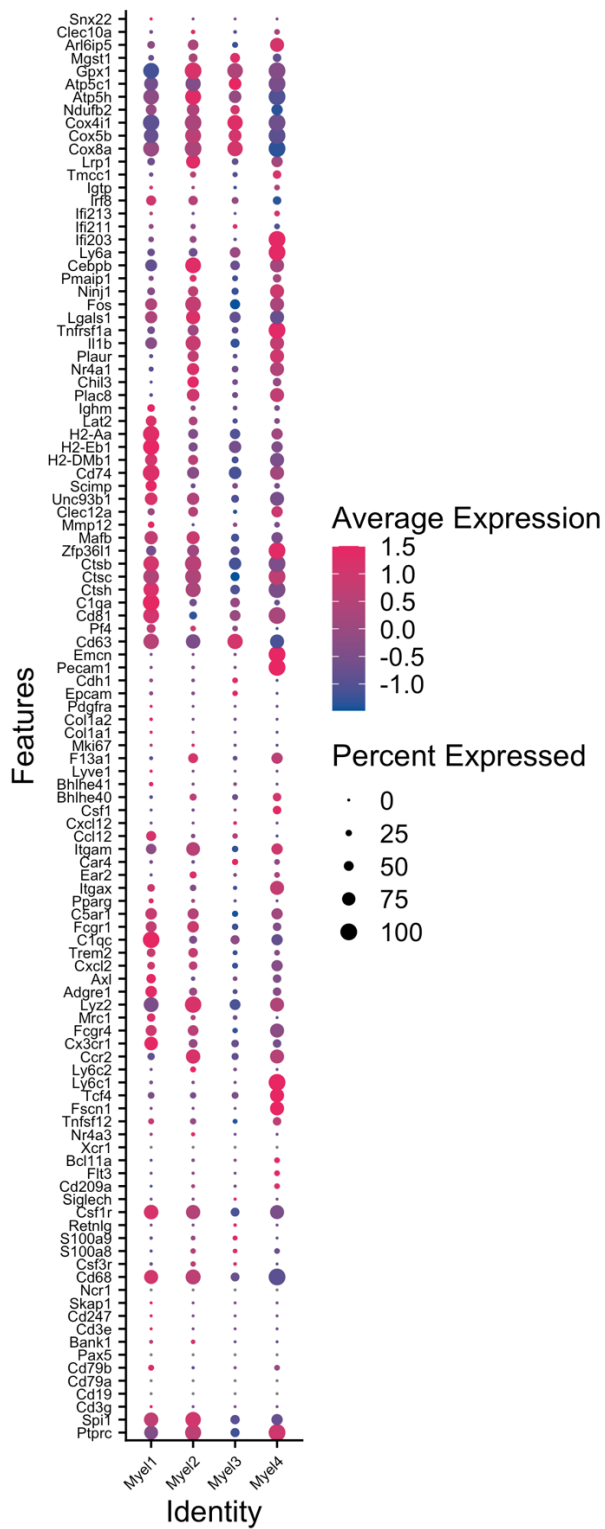

**Supplementary Figure S1.** Expression of known leukocyte and myeloid cell markers in myeloid sub-clusters by scRNAseq

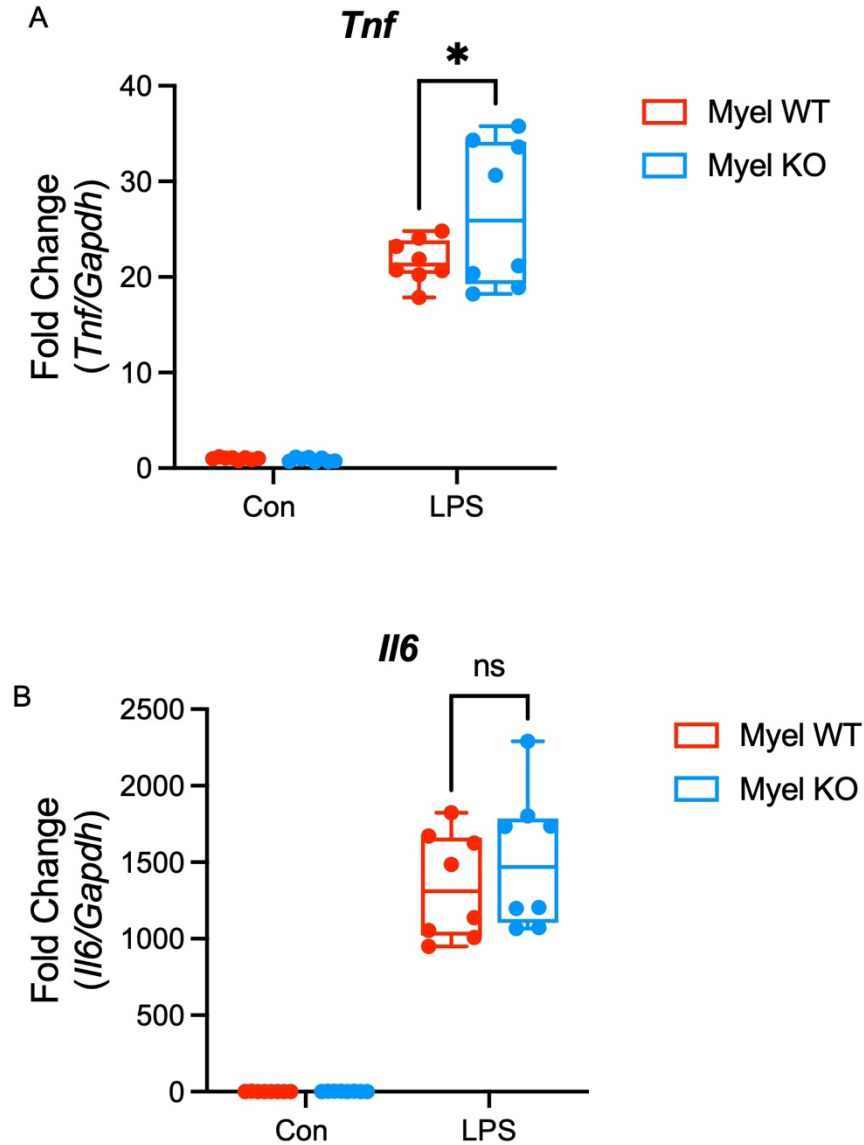

**Supplementary Figure S2. The effect of IL1R1 in CD11c<sup>+</sup> bone marrow-derived dendritic cells on *Tnf* and *Il6* mRNA expression.** Bone marrow-derived dendritic cells were generated from Myel WT and Myel KO mice, were stimulated with Vehicle (Con) or LPS, and RT-PCR was performed for *Tnf* and *Il6* mRNA. (n = 8; \*p<0.05 by two-way ANOVA with Sidak post-test).

A

Reference UMAP

IL1RN Expression

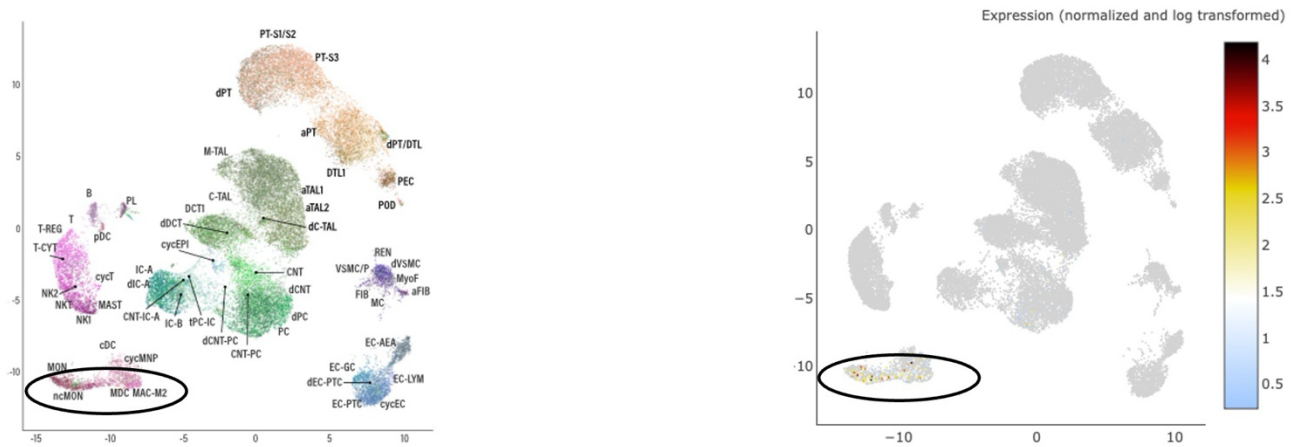

B

| Cluster | Cluster Name           | Fold Change | Adjusted p val |
|---------|------------------------|-------------|----------------|
| MAC-M2  | M2-Macrophage          | 0.752       | 7.94E-38       |
| ncMON   | Non-classical Monocyte | 1.06        | 1.79E-30       |

**Supplementary Figure S3. Expression of *IL1RN* in human kidneys following AKI as measured by single cell RNA sequencing.** (A) UMAP plot showing cell clusters in database with feature plot for *IL1RN* at right. Non-classical monocytes (ncMON) and M2 Macrophages (MAC-M2) clusters are denoted by black circle. (B) Table showing the cell clusters with significant fold change in *IL1RN* gene expression relative to other cell clusters (<https://atlas.kpmp.org/explorer/dataviz>).

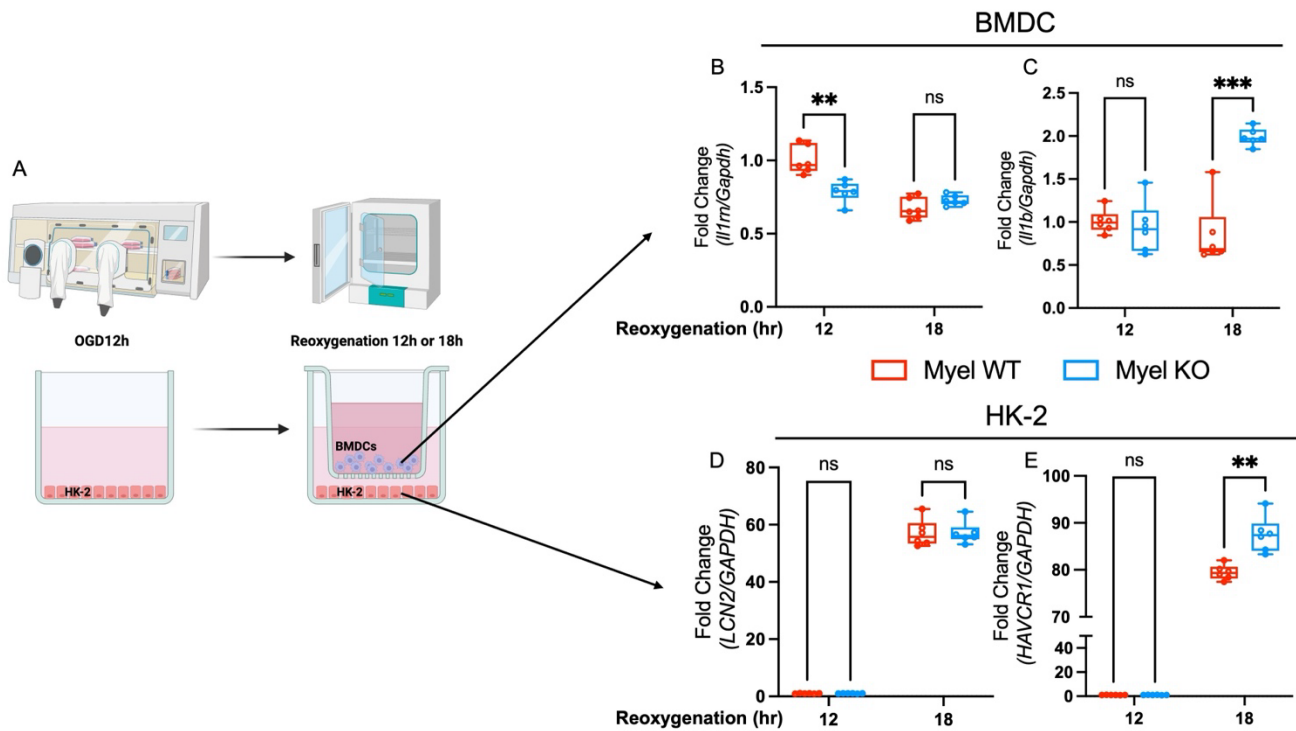

**Supplementary Figure S4. IL-1R1 on CD11c<sup>+</sup> BMDC limits ischemic renal tubular cell injury in vitro.** (A) Schematic experimental workflow for oxygen-glucose deprivation of HK-2 cells and co-culture with BMDC (Created with Biorender.com). (B-E) After OGD and co-culture for indicated timepoints, mRNA was collected from BMDC and HK-2. Shown in graphs are (B) *Il1rn* and (C) *Il1b* mRNA expression in Myel WT and Myel KO BMDC; and (D) *LCN2*/NGAL and (E) *HAVCR1*/KIM-1 mRNA expression in HK-2 cells (n = 6; \*p < 0.05 by multiple comparisons T test).
